# Supplementary material for: Nucleolar and coiled-body phosphoprotein 1 (NOLC1) regulates the nucleolar retention of TRF2
Source: PubMed Central journal article supplement (PMC5582526; doi:10.1038/cddiscovery.2017.43), 2017-09-04
Supplement: cddiscovery201743-s1.pdf [file cddiscovery201743-s1.pdf]

## Supplementary Information

### **Nucleolar and Coiled-body Phosphoprotein 1 (NOLC1) Regulates the Nucleolar Retention of TRF2**

Fuwen Yuan<sup>1</sup>, Guodong Li<sup>1</sup>, and Tanjun Tong<sup>1</sup>, \*

<sup>1</sup> Research Center on Aging, Department of Biochemistry and Molecular Biology, School of Basic Medical Sciences, Peking University, Beijing, China.

\* Correspondence and requests for materials should be addressed to T. T. (Email: [ttj@bjmu.edu.cn](mailto:ttj@bjmu.edu.cn))

Fig. S1

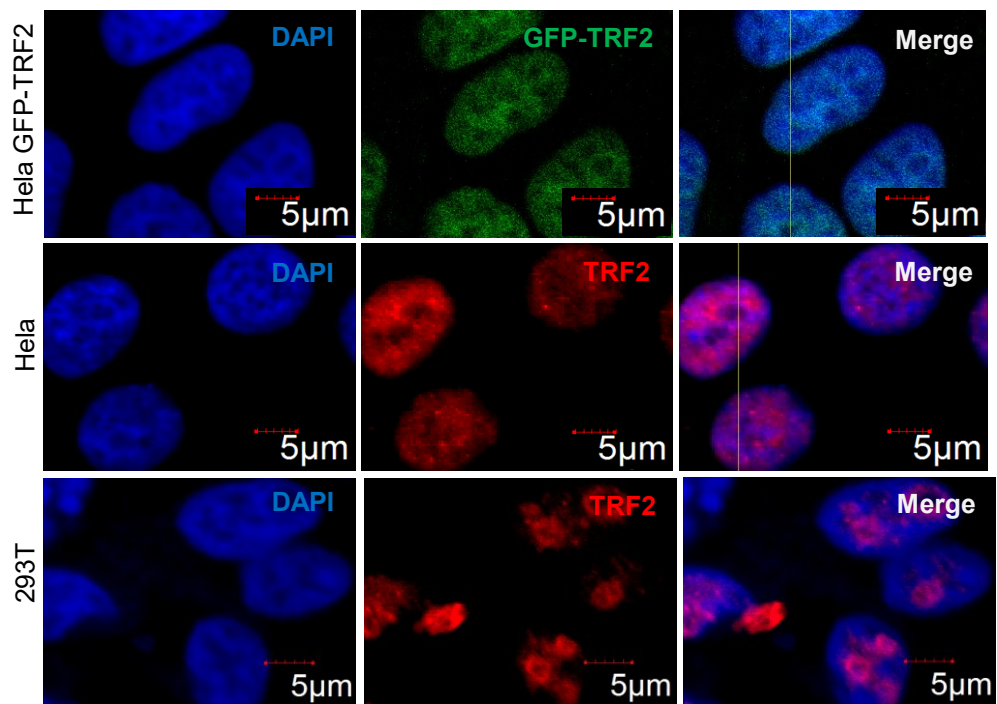

**Fig. S1. The localization of TRF2 in HeLa and 293T cells.** Immunofluorescence with a mouse antibody against TRF2 or heterogenous expression GFP-tag TRF2 revealed a nucleus localization in human HeLa (the first and second line), while located in nucleolus in 293T cells (the last line).

Fig. S2

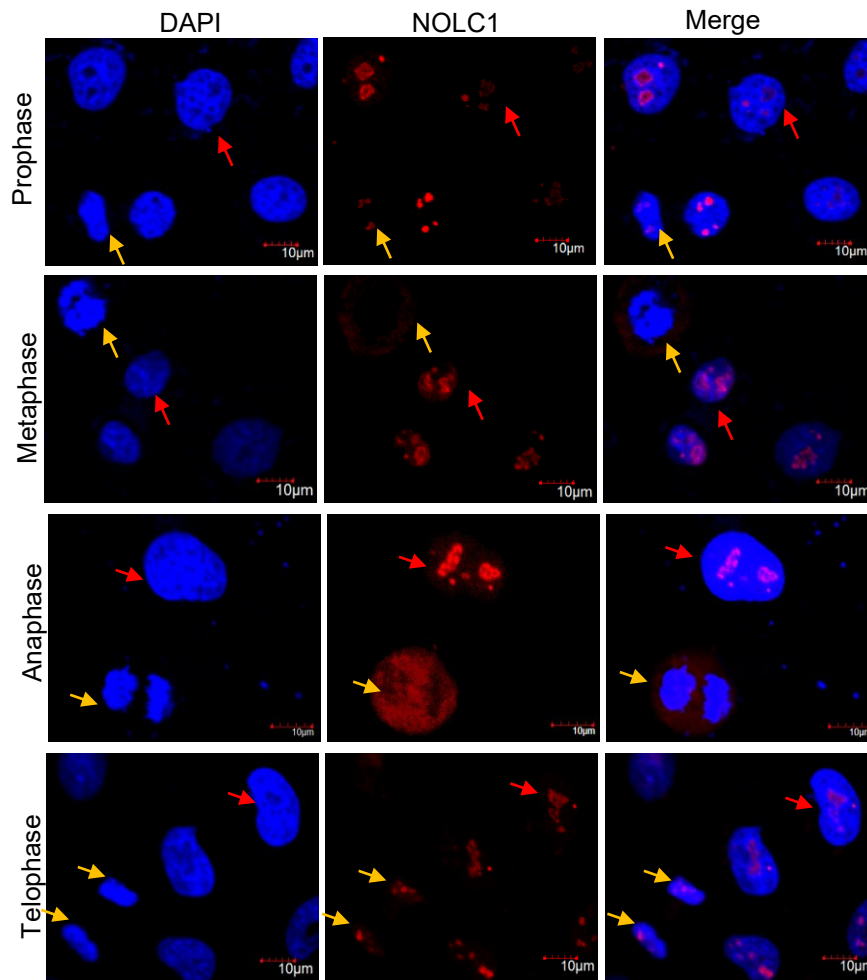

**Fig. S2. NOLC1 shows a cell cycle dependent distribution in HepG2 cells.** Immunofluorescence with a rabbit antibody against NOLC1 reveals a cell cycle dependent localization of NOLC1 in human HepG2 cells. In metaphase, NOLC1 release to nucleus.

Fig. S3

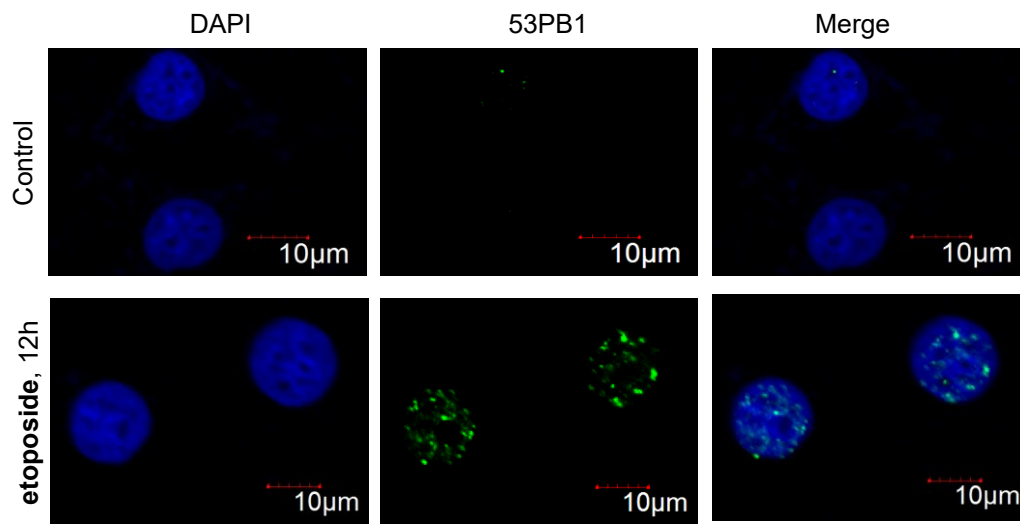

**Fig. S3. 53BP1 was induced with etoposide treatment.** HepG2 cells were treated with 40µM etoposide for 12 hours before harvest for analysis, immunofluorescence with a rabbit antibody against 53BP1 indicated that the 53BP1 foci were induced with etoposide treatment.

Fig. S4

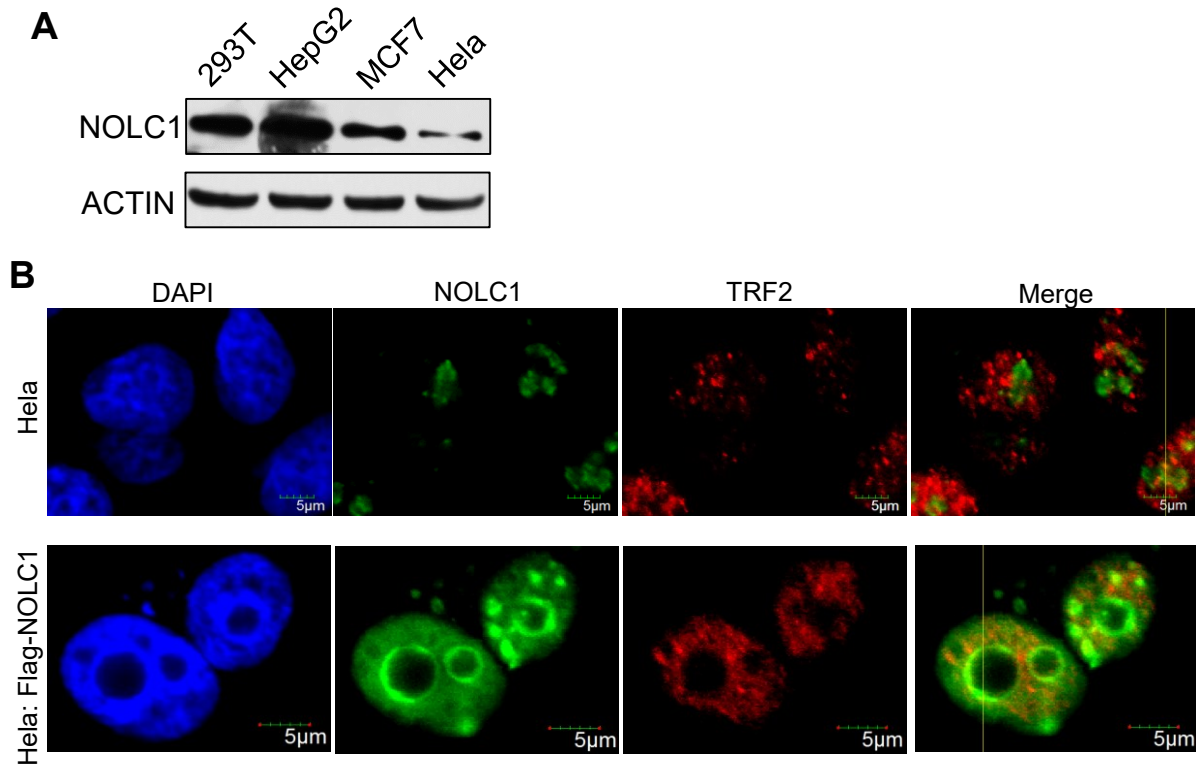

**Fig. S4. NOLC1 have no significant influence on the distribution of TRF2 in HeLa cells as in 293T or HepG2 cells.** (A) The expression of TRF2 in 293T, HepG2, MCF7 and HeLa cells was detected by western blot. (B) HeLa cells were transfected with Flag-NOLC1 for 48 hours. Immunofluorescence with a rabbit antibody against NOLC1 and a mouse antibody against TRF2 reveals a weak co-localization of NOLC1 and TRF2 in human HeLa cells.
