# Supplementary material for: Nucleolar and coiled-body phosphoprotein 1 (NOLC1) regulates the nucleolar retention of TRF2
Source: PubMed Central journal article supplement (PMC5582526; doi:10.1038/cddiscovery.2017.43), 2017-09-04

WB, Figure 1c

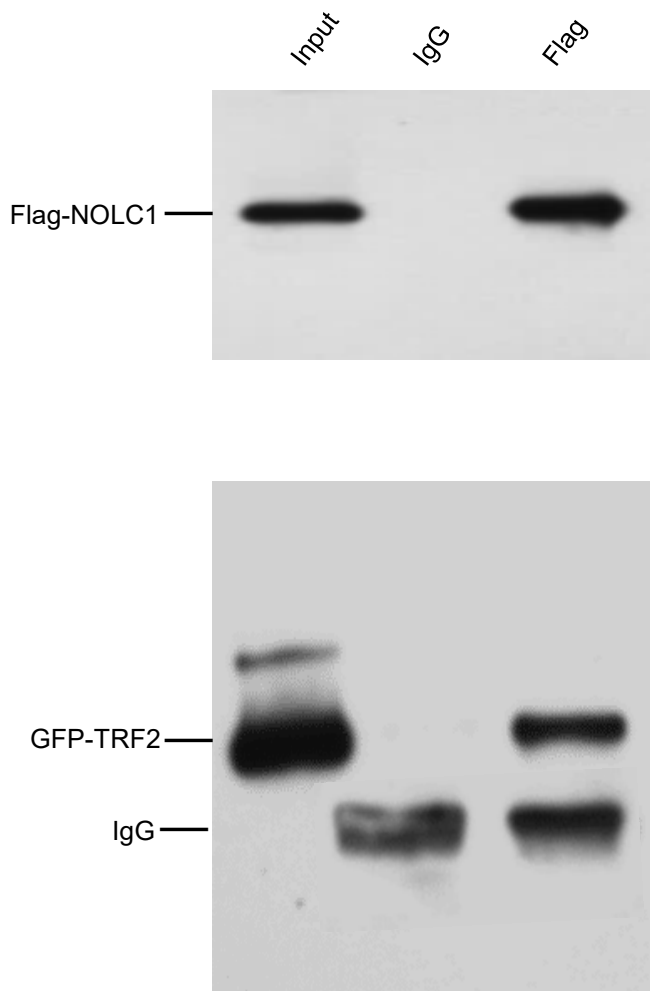

WB, Figure 1d

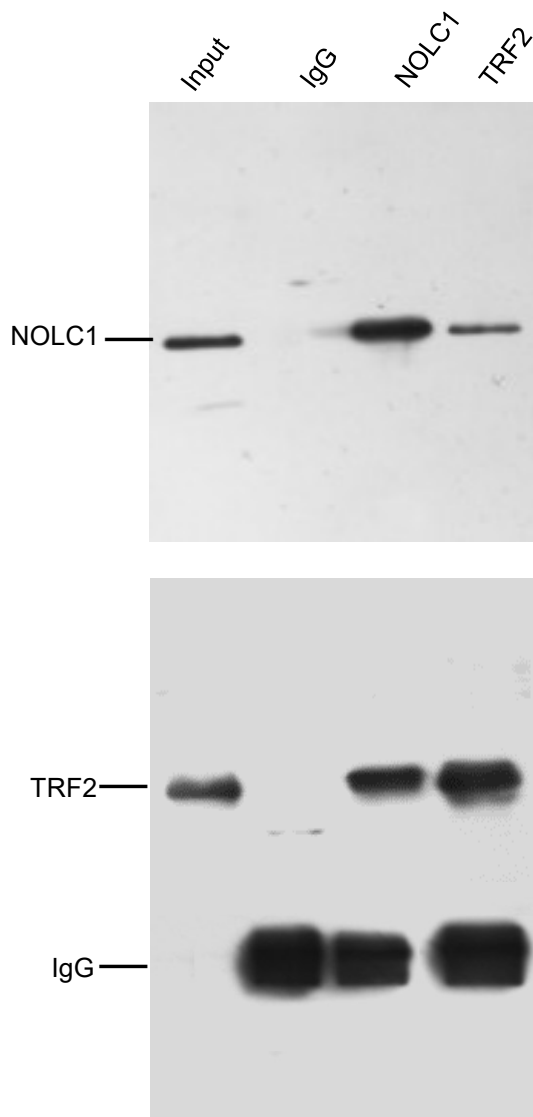

WB, Figure 3a

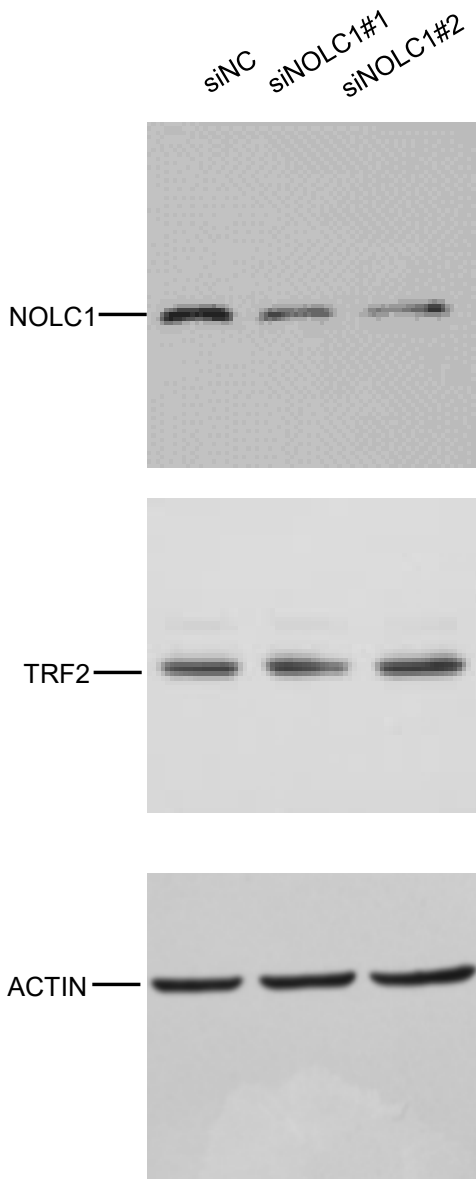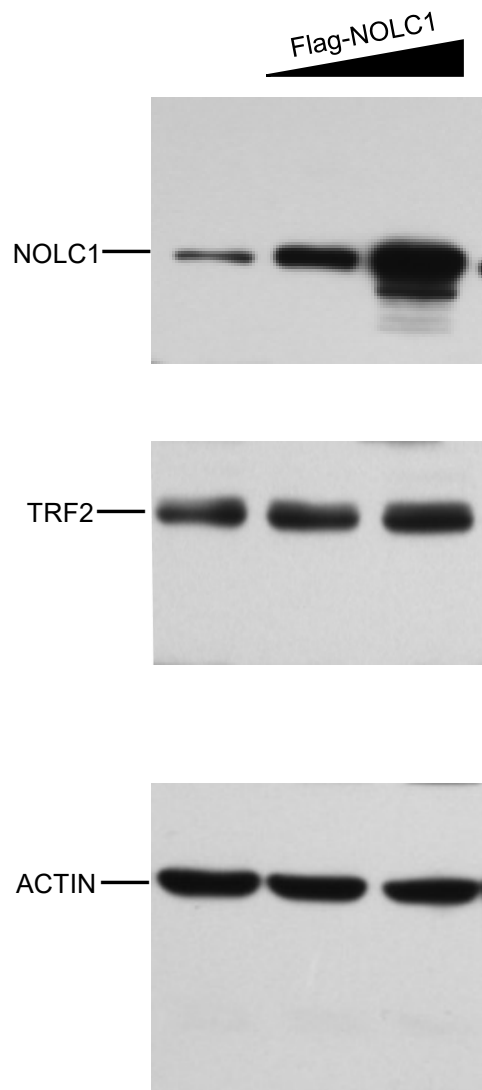

WB, Figure 3e

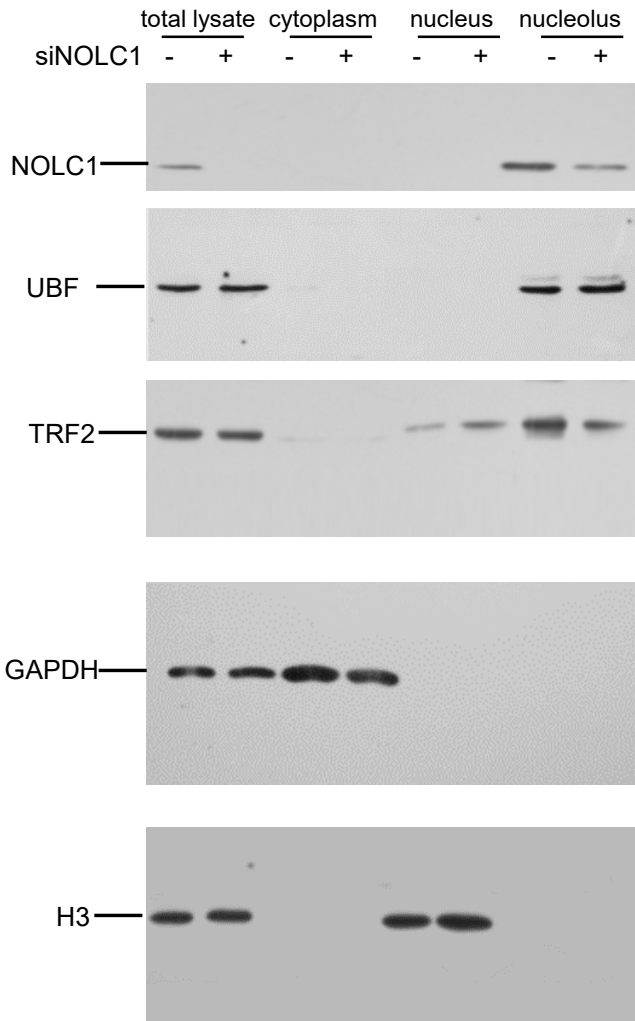

WB, Figure 3f

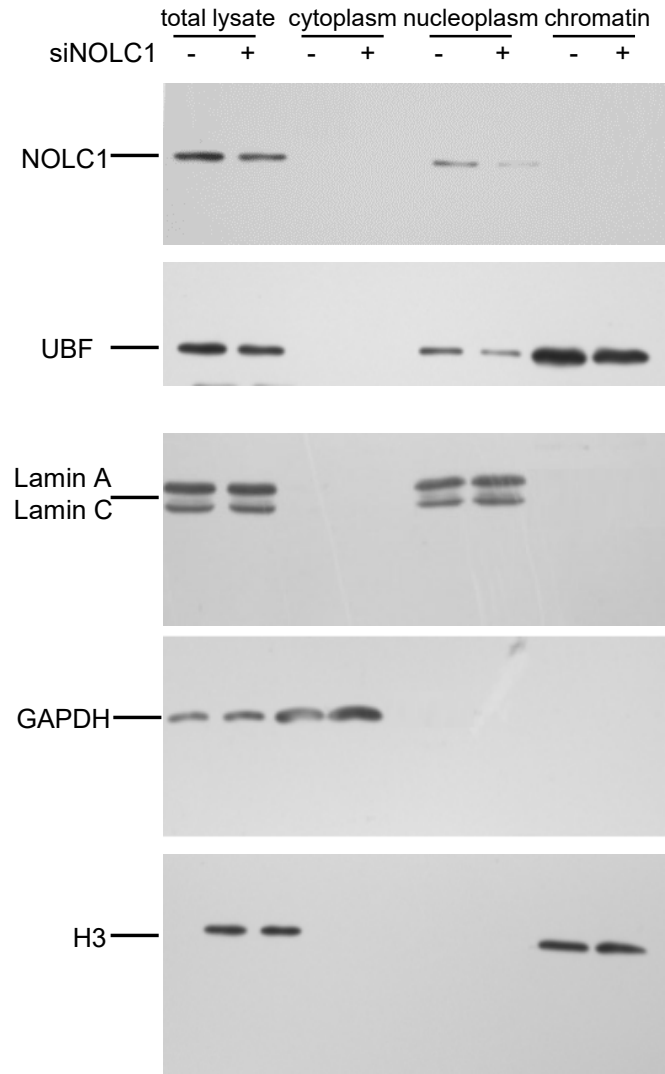

WB, Figure 4b

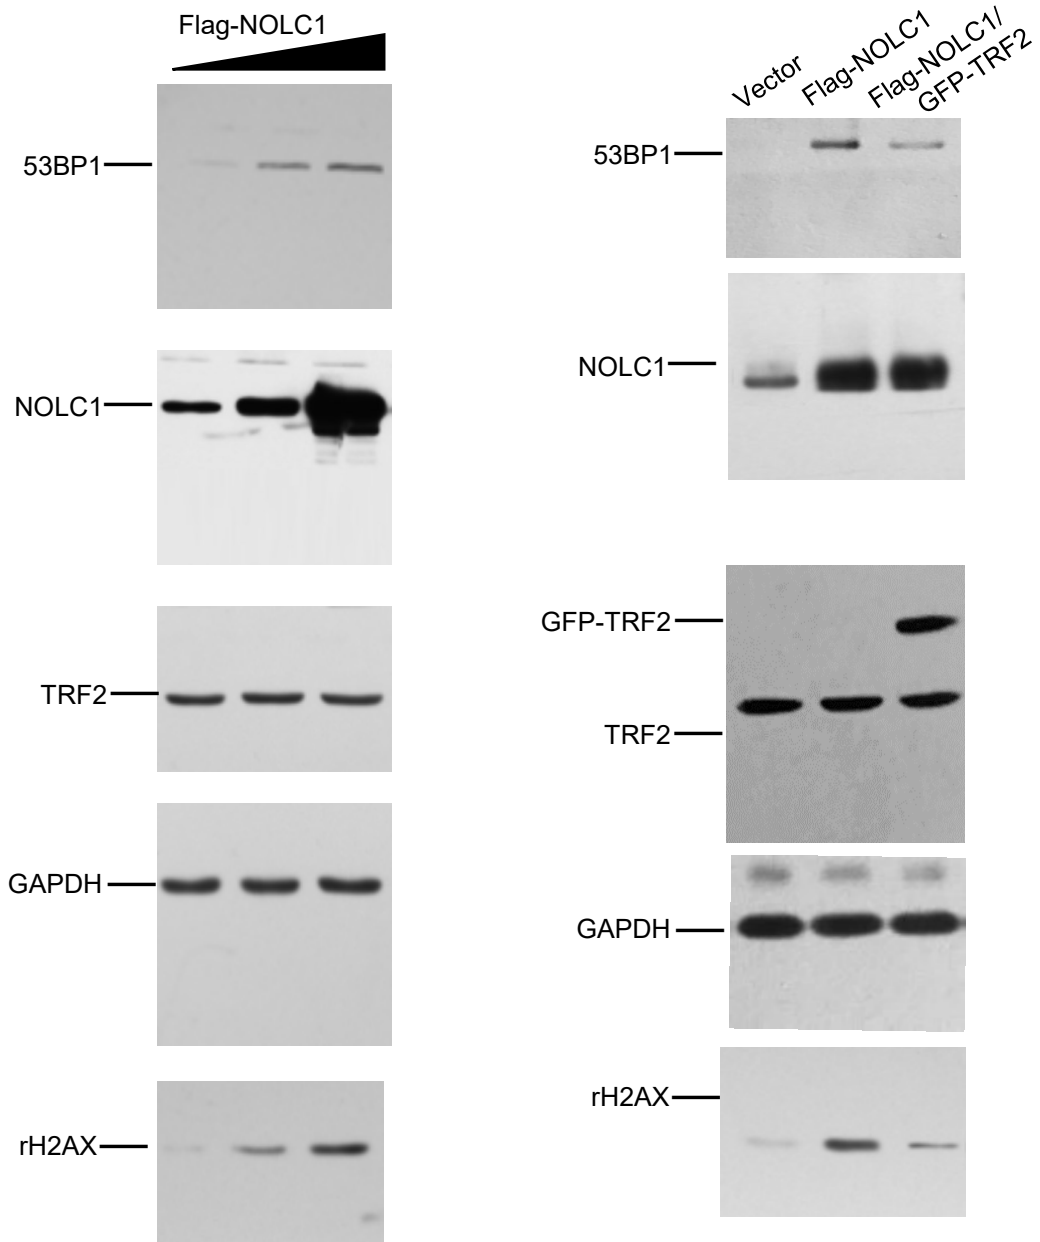

WB, Figure 5c, left

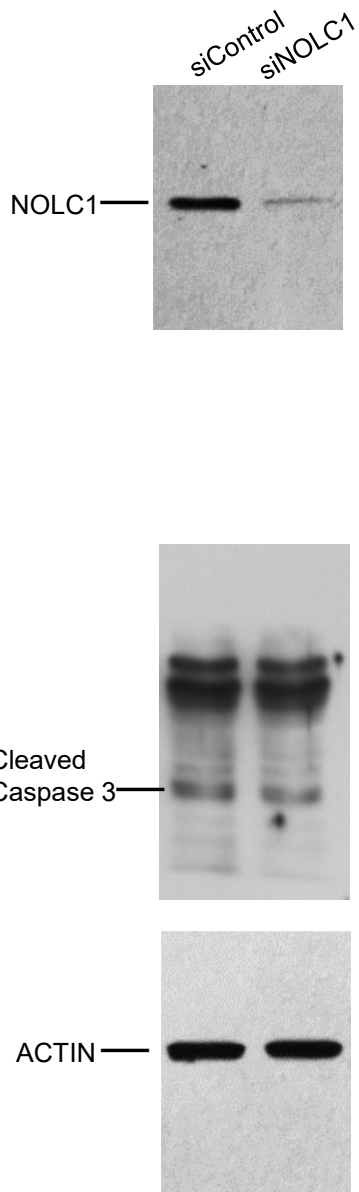

WB, Figure 5c, middle

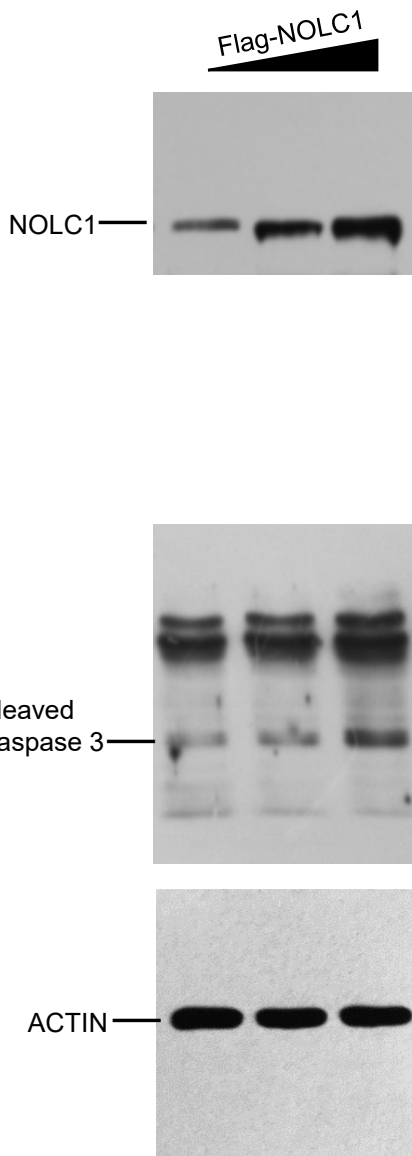

WB, Figure 5c, right

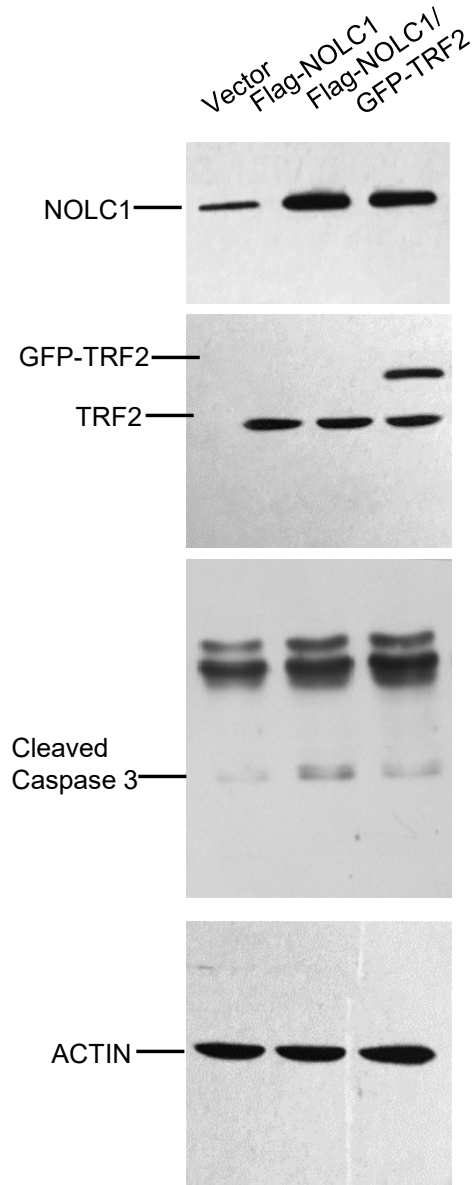

Supplement: cddiscovery201743-s2.pdf [file cddiscovery201743-s2.pdf]
